# Supplementary material for: Stereospecific polymerization of conjugated dienes using neodymium alkylborohydride complexes
Source: Royal Society of Chemistry journal article supplement (doi:10.1039/c8dt04220a), 2019-01-01
Supplement: c8dt04220a1.pdf [file c8dt04220a1.pdf]

# Supporting Information

## Stereospecific polymerization of conjugated dienes using neodymium alkylborohydride complexes

Ryo Tanaka\*, Yuto Shinto, Ryusei Matsuzaki, Yuushou Nakayama and Takeshi Shiono

### Table of Contents

|                                                                 |      |
|-----------------------------------------------------------------|------|
| NMR and IR spectra of Neodymium complexes <b>3</b> and <b>4</b> | 2-4  |
| X-ray refinement data of complexes <b>3</b> and <b>4</b>        | 5    |
| NMR spectra of obtained polymer                                 | 6-19 |

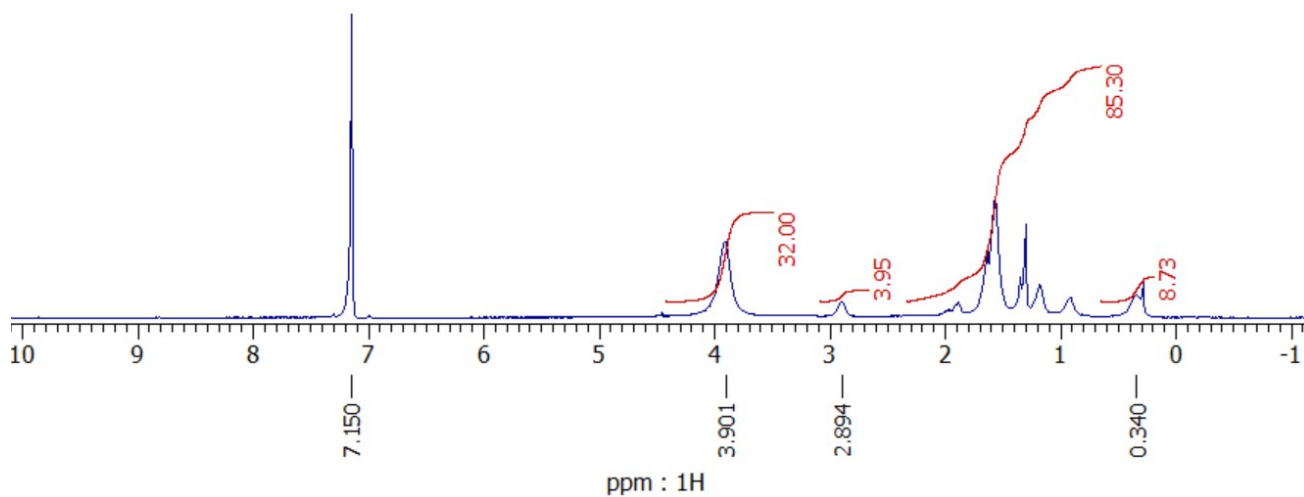

**Figure S1.**  $^1\text{H}$  NMR spectrum of complex **3** (500 MHz, in  $\text{C}_6\text{D}_6$ ).

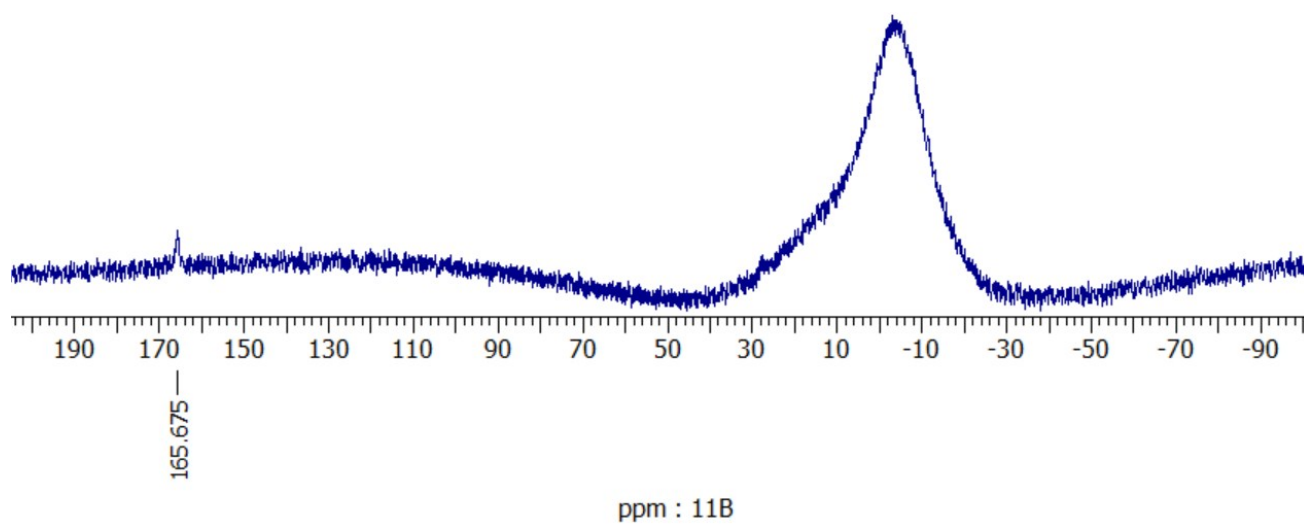

**Figure S2.**  $^{11}\text{B}$  NMR spectrum of complex **3** (160 MHz, in  $\text{C}_6\text{D}_6$ ).

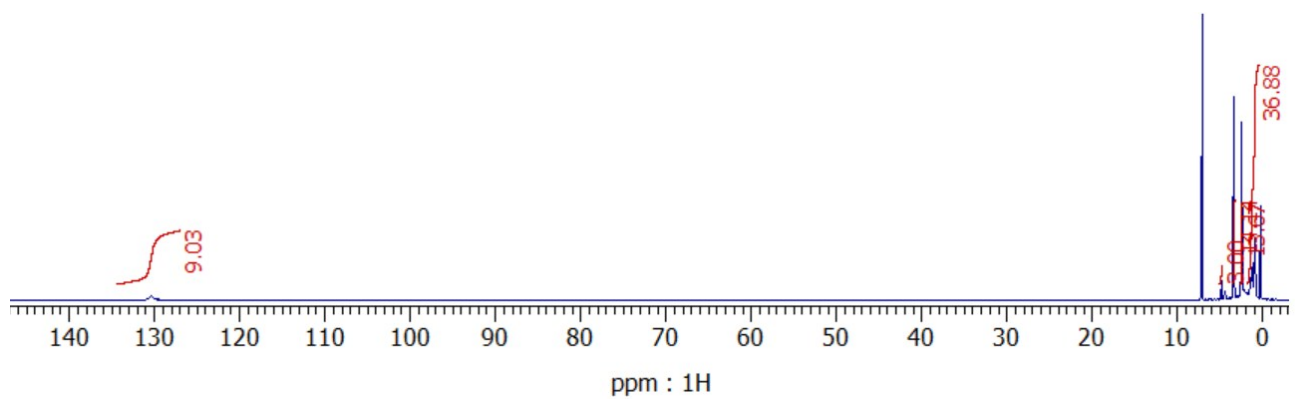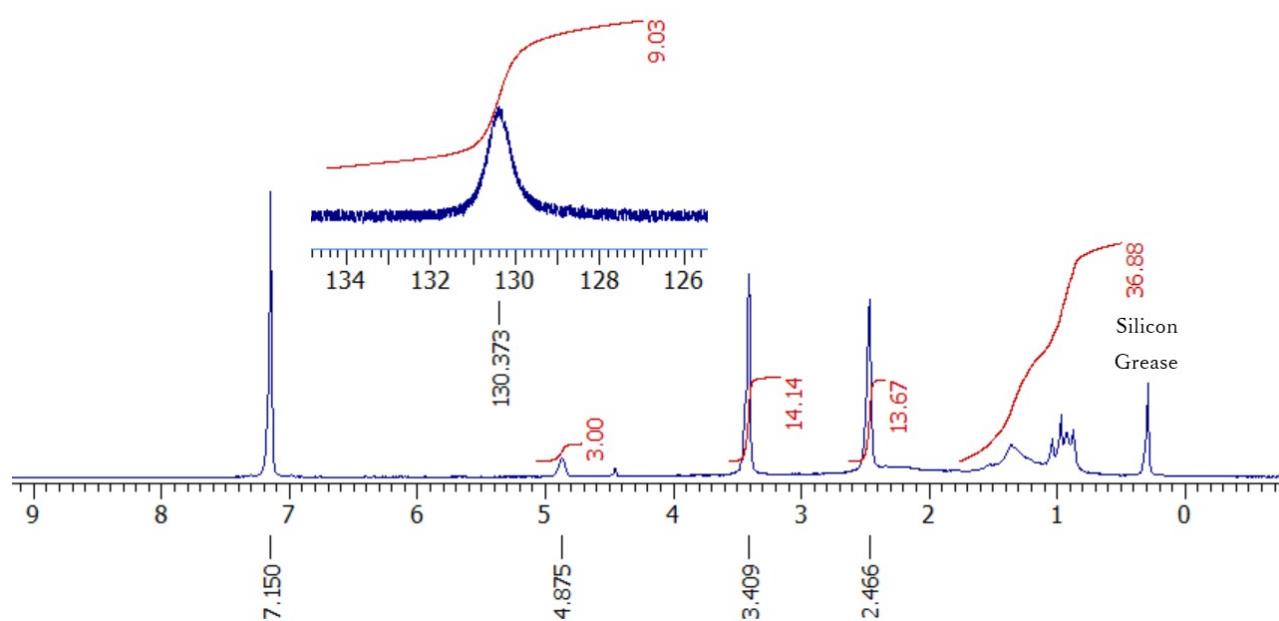

**Figure S3.**  $^1\text{H}$  NMR spectrum of complex **4** (500 MHz, in  $\text{C}_6\text{D}_6$ ).

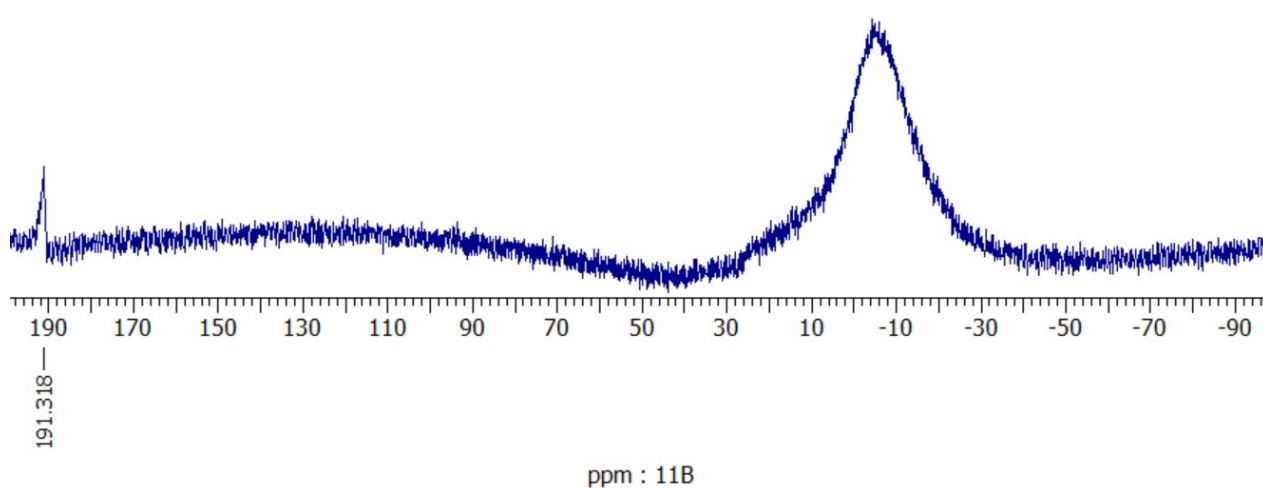

**Figure S4.**  $^{11}\text{B}$  NMR spectrum of complex **4** (160 MHz, in  $\text{C}_6\text{D}_6$ ).

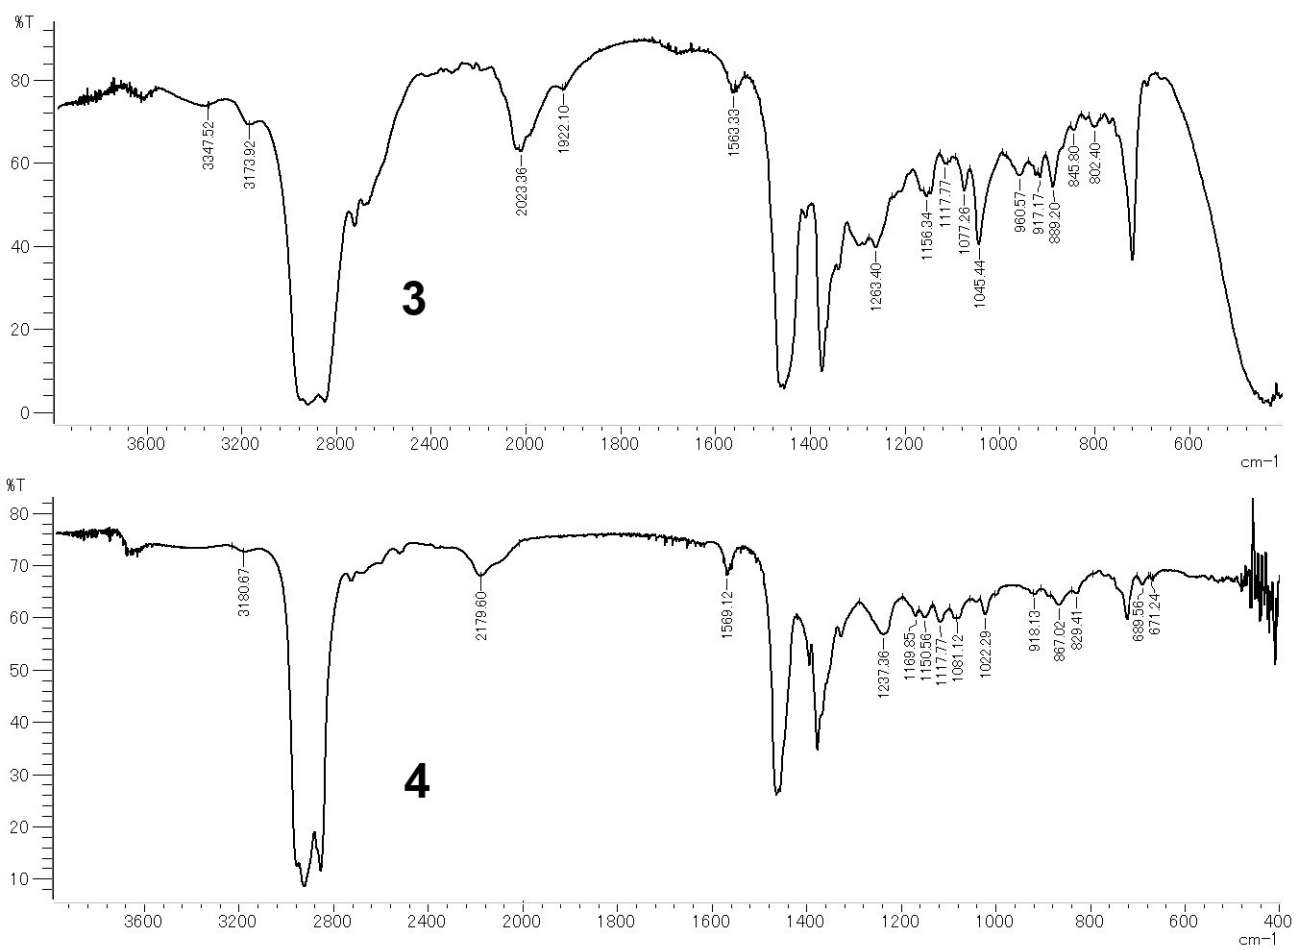

**Figure S5.** IR spectra of complexes **3** and **4** (Nujol).

**Table S1.** Crystal refinement data for complexes **3** and **4**.

| Compound                                          | <b>3</b>                                                                                                            | <b>4</b>                                                        |
|---------------------------------------------------|---------------------------------------------------------------------------------------------------------------------|-----------------------------------------------------------------|
| Wavelength (Å)                                    | 0.71069 Å                                                                                                           | 0.71069 Å                                                       |
| Temperature (K)                                   | 123                                                                                                                 | 123                                                             |
| Empirical formula                                 | C <sub>40</sub> H <sub>80</sub> B <sub>4</sub> NdO <sub>2</sub><br>C <sub>24</sub> H <sub>48</sub> NaO <sub>6</sub> | C <sub>30</sub> H <sub>72</sub> B <sub>3</sub> NdO <sub>3</sub> |
| Formula weight                                    | 1236.13                                                                                                             | 657.54                                                          |
| Crystal system                                    | Triclinic                                                                                                           | Monoclinic                                                      |
| Space group                                       | <i>P</i> -1                                                                                                         | <i>P</i> <sub>2</sub> <sub>1</sub> / <i>c</i>                   |
| <i>a</i> (Å)                                      | 11.2257(11)                                                                                                         | 11.2474(14)                                                     |
| <i>b</i> (Å)                                      | 11.2958(11)                                                                                                         | 16.788(2)                                                       |
| <i>c</i> (Å)                                      | 14.3024(14)                                                                                                         | 20.353(2)                                                       |
| $\alpha$ (deg)                                    | 77.2071(13)                                                                                                         | 90                                                              |
| $\beta$ (deg)                                     | 80.0236(14)                                                                                                         | 101.486(2)                                                      |
| $\gamma$ (deg)                                    | 79.6023(13)                                                                                                         | 90                                                              |
| Volume (Å <sup>3</sup> )                          | 1722.7(3)                                                                                                           | 3766.1(7)                                                       |
| <i>Z</i>                                          | 1                                                                                                                   | 4                                                               |
| <i>D</i> <sub>calc</sub> (g/cm <sup>3</sup> )     | 1.192                                                                                                               | 1.160                                                           |
| $\mu$ (mm <sup>-1</sup> )                         | 0.808                                                                                                               | 1.403                                                           |
| <i>F</i> (000)                                    | 667.0                                                                                                               | 1404.0                                                          |
| Crystal size (mm)                                 | 0.2 x 0.2 x 0.2                                                                                                     | 0.1 x 0.1 x 0.05                                                |
| $\theta_{\max}$ (deg)                             | 27.405                                                                                                              | 27.381                                                          |
| Index ranges                                      | -12 ≤ <i>h</i> ≤ 14                                                                                                 | -14 ≤ <i>h</i> ≤ 14                                             |
|                                                   | -14 ≤ <i>k</i> ≤ 14                                                                                                 | -21 ≤ <i>k</i> ≤ 20                                             |
|                                                   | -10 ≤ <i>l</i> ≤ 18                                                                                                 | -26 ≤ <i>l</i> ≤ 9                                              |
| No. of reflections observed                       | 7558                                                                                                                | 8506                                                            |
| No. of parameters refined                         | 527                                                                                                                 | 402                                                             |
| <i>T</i> <sub>min</sub> , <i>T</i> <sub>max</sub> | 0.6789, 0.7455                                                                                                      | 0.6599, 0.7455                                                  |
| <i>R</i> <sub>1</sub>                             | 0.0373                                                                                                              | 0.0484                                                          |
| <i>wR</i> <sub>2</sub>                            | 0.0963                                                                                                              | 0.0998                                                          |
| GoF on <i>F</i> <sup>2</sup>                      | 1.049                                                                                                               | 0.994                                                           |

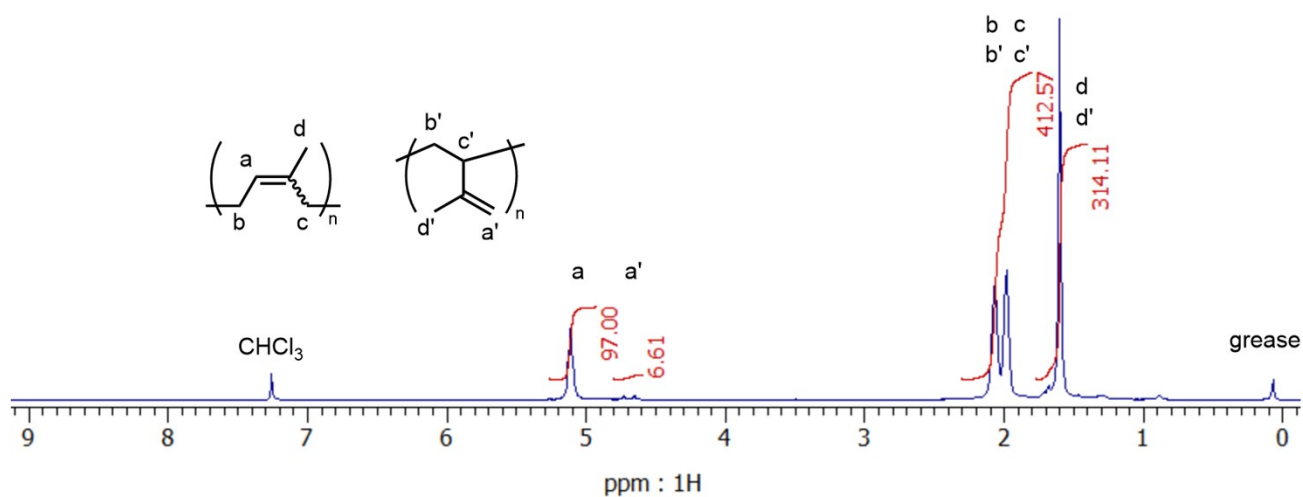

**Figure S6.**  $^1\text{H}$  NMR of polyisoprene obtained in Table 2, run 2 (500 MHz, in  $\text{CDCl}_3$ ).

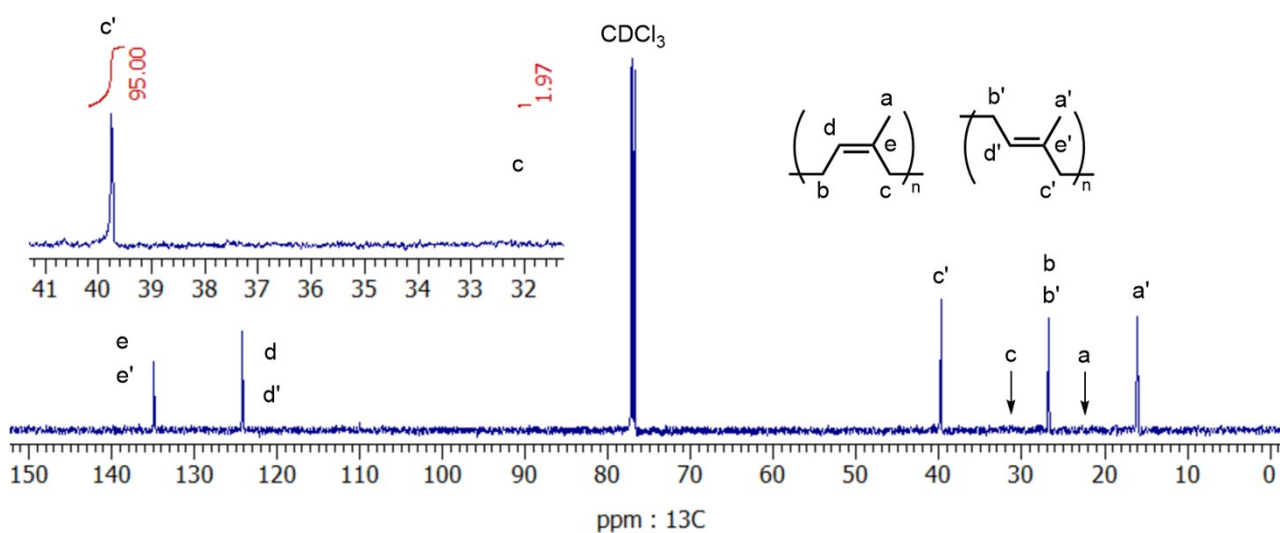

**Figure S7.**  $^{13}\text{C}$  NMR of polyisoprene obtained in Table 2, run 2 (125 MHz, in  $\text{CDCl}_3$ ).

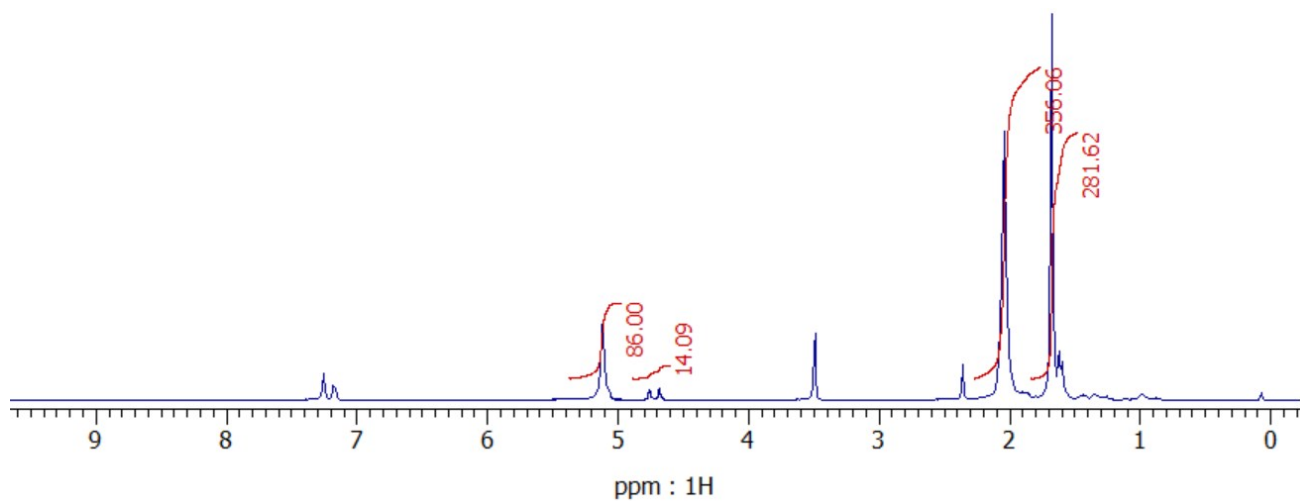

**Figure S8.**  $^1\text{H}$  NMR of polyisoprene obtained in Table 2, run 3 (500 MHz, in  $\text{CDCl}_3$ ).

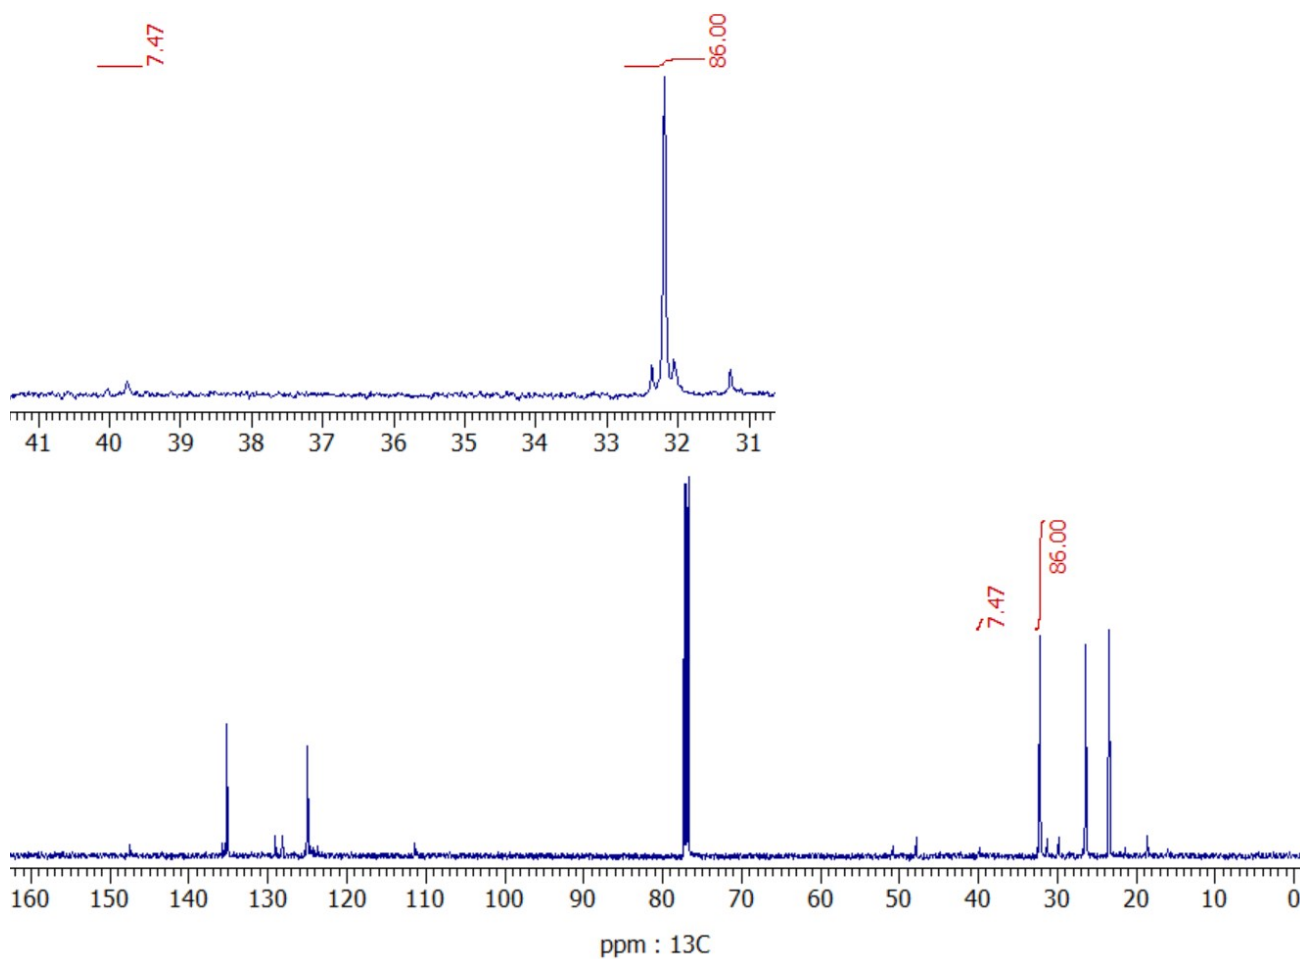

**Figure S9.**  $^{13}\text{C}$  NMR of polyisoprene obtained in Table 2, run 3 (125 MHz, in  $\text{CDCl}_3$ ).

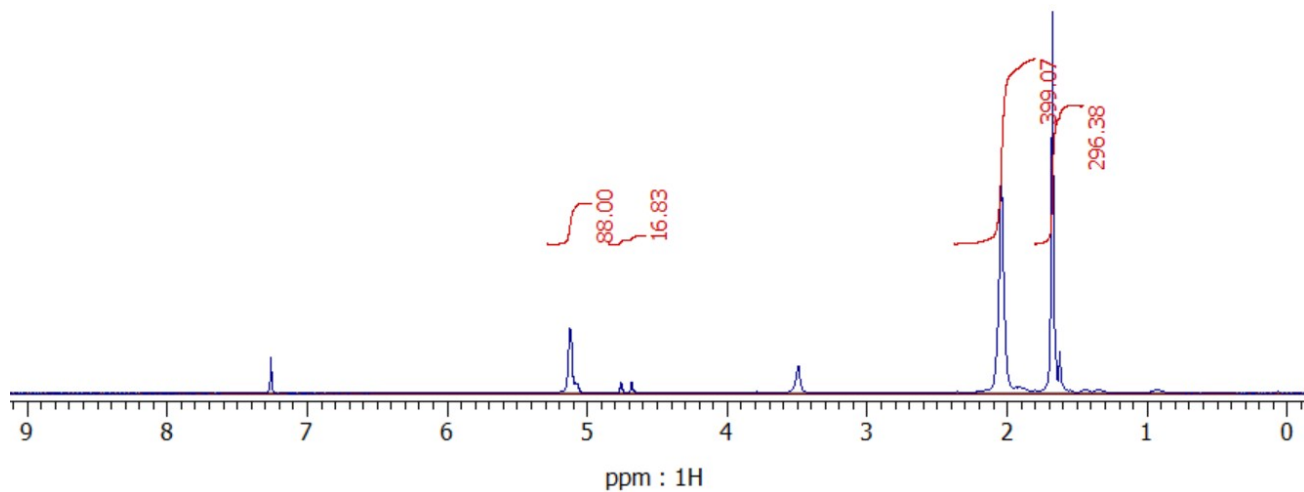

**Figure S10.**  $^1\text{H}$  NMR of polyisoprene obtained in Table 2, run 4 (500 MHz, in  $\text{CDCl}_3$ ).

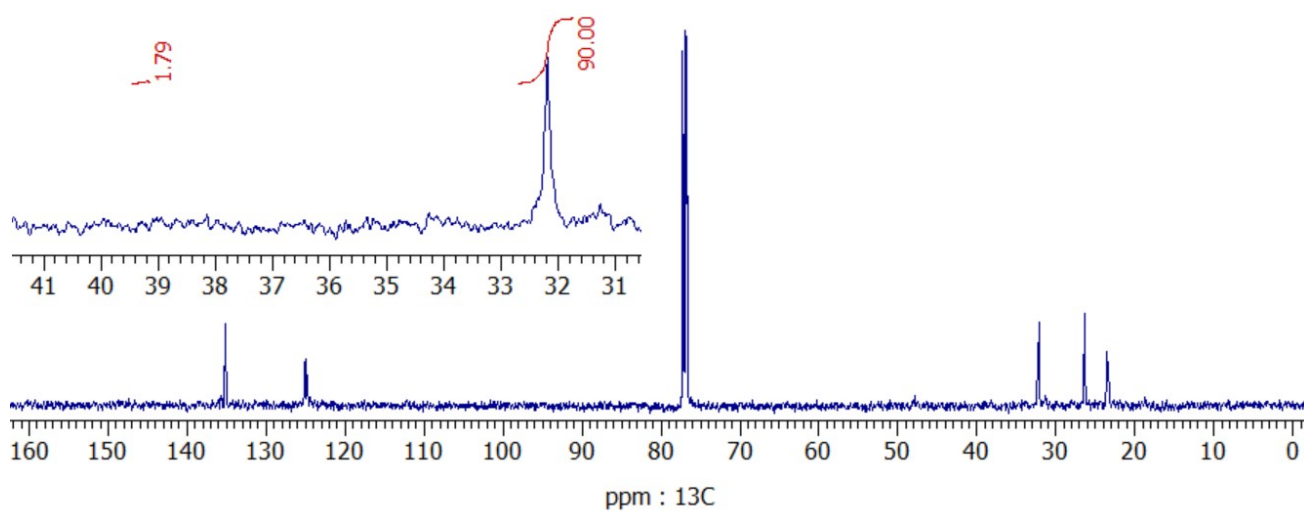

**Figure S11.**  $^{13}\text{C}$  NMR of polyisoprene obtained in Table 2, run 4 (125 MHz, in  $\text{CDCl}_3$ ).



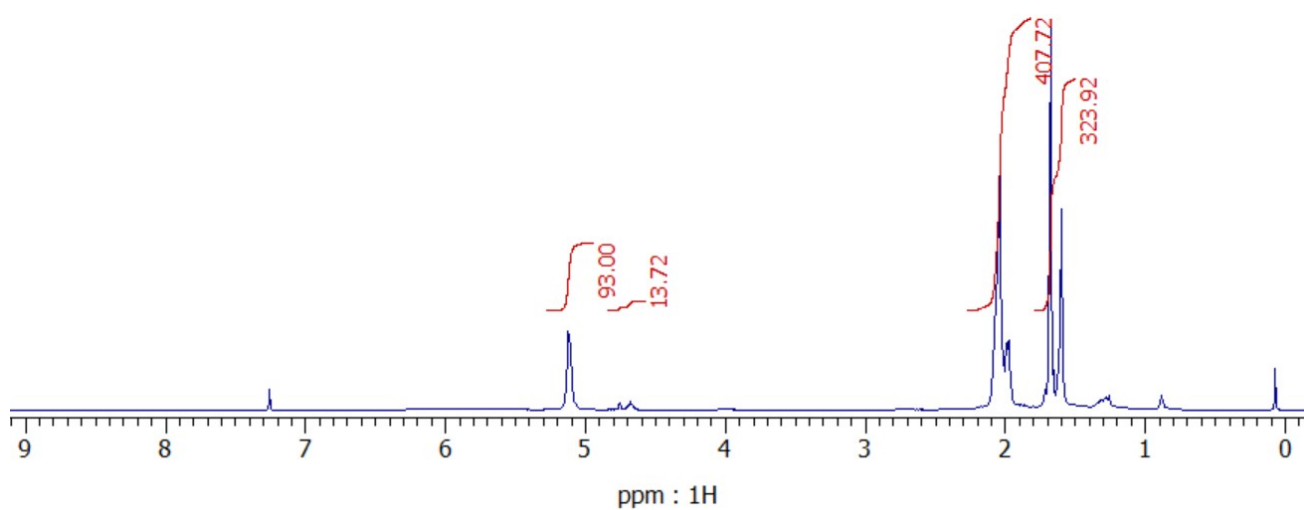

**Figure S12.**  $^1\text{H}$  NMR of polyisoprene obtained in Table 2, run 5 (500 MHz, in  $\text{CDCl}_3$ ).

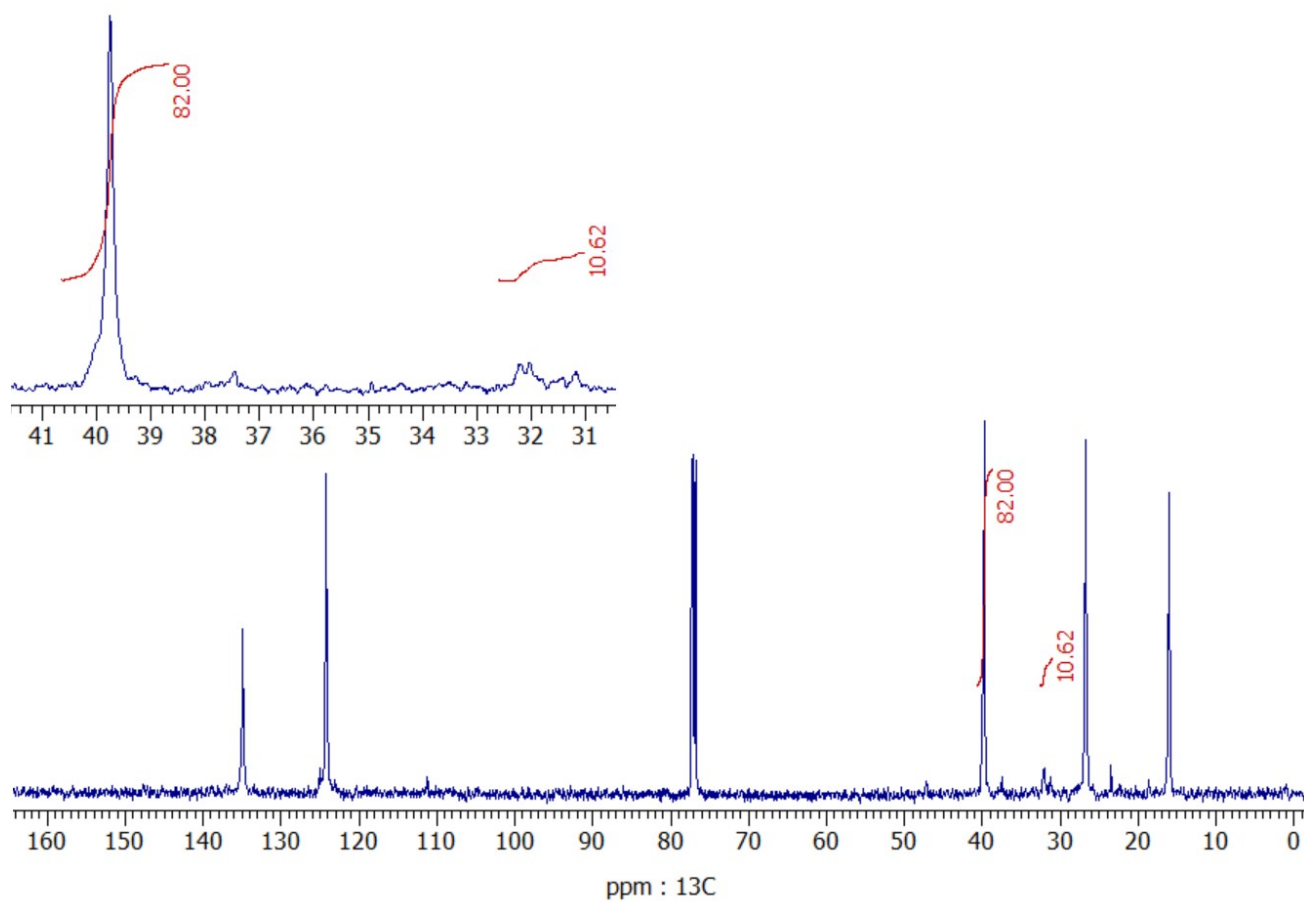

**Figure S13.**  $^{13}\text{C}$  NMR of polyisoprene obtained in Table 2, run 5 (125 MHz, in  $\text{CDCl}_3$ ).

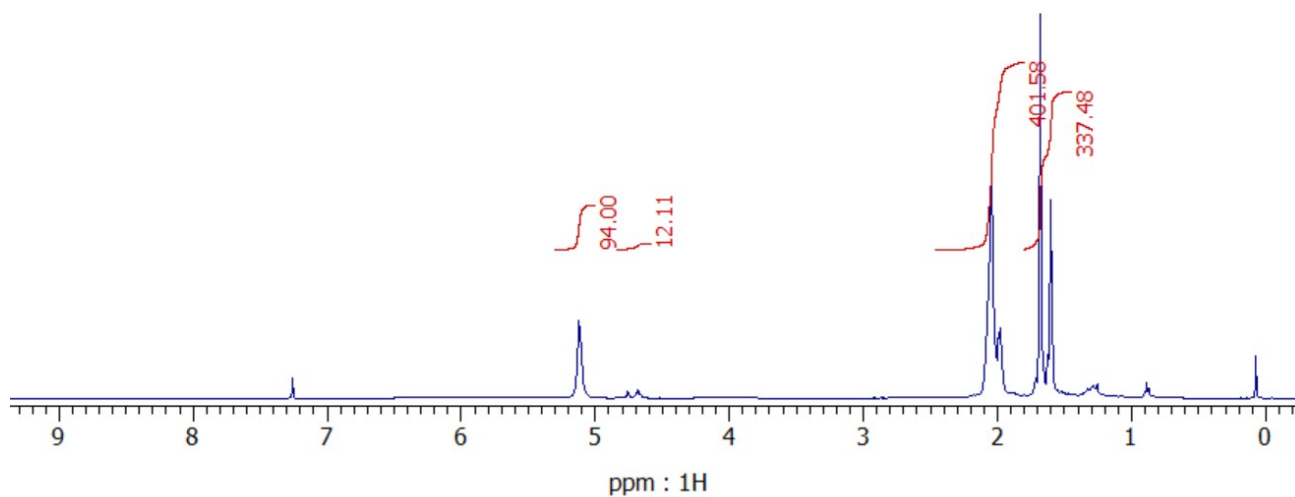

**Figure S14.**  $^1\text{H}$  NMR of polyisoprene obtained in Table 2, run 6 (500 MHz, in  $\text{CDCl}_3$ ).

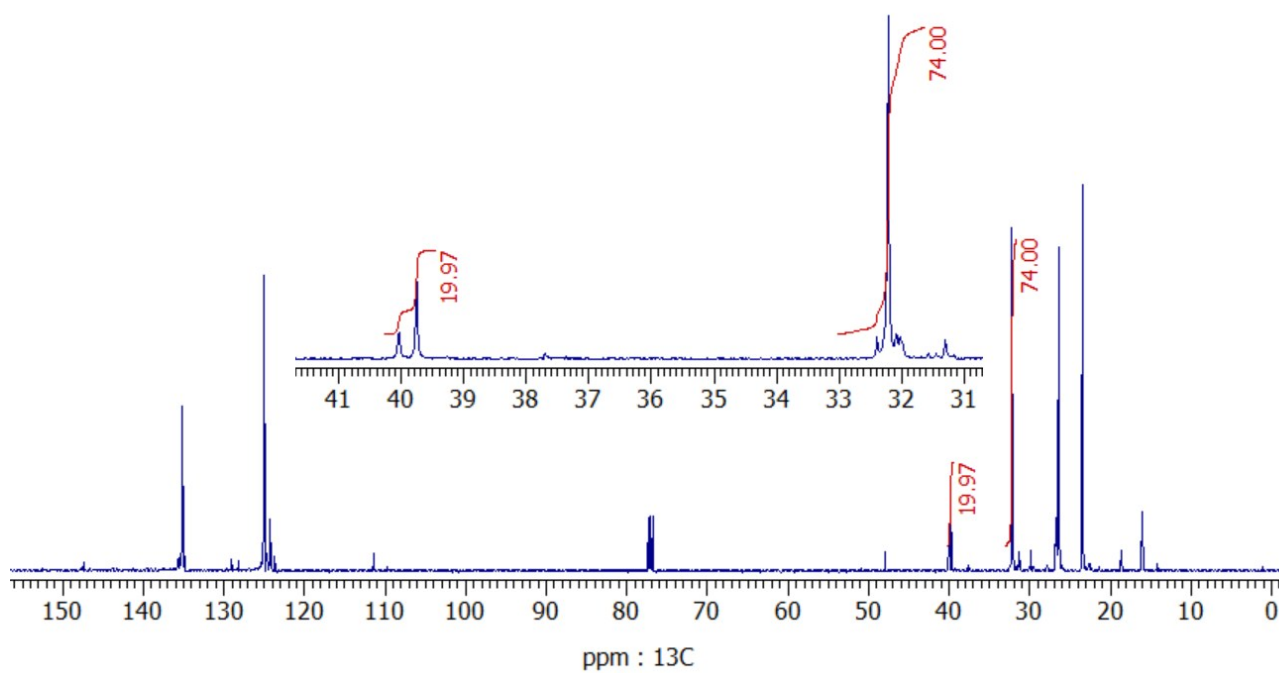

**Figure S15.**  $^{13}\text{C}$  NMR of polyisoprene obtained in Table 2, run 6 (125 MHz, in  $\text{CDCl}_3$ ).

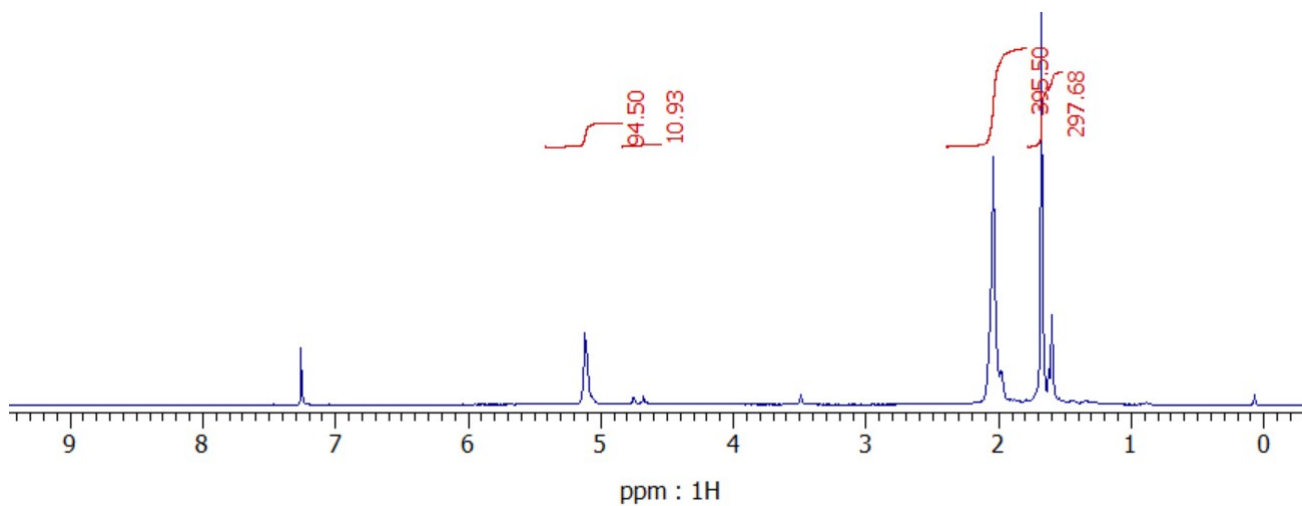

**Figure S16.**  $^1\text{H}$  NMR of polyisoprene obtained in Table 2, run 7 (500 MHz, in  $\text{CDCl}_3$ ).

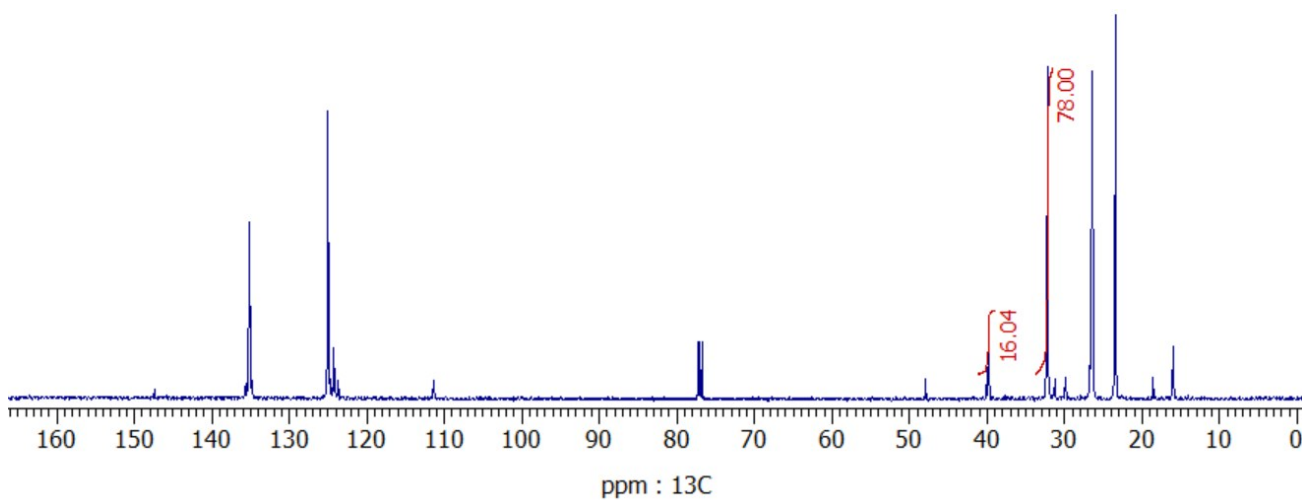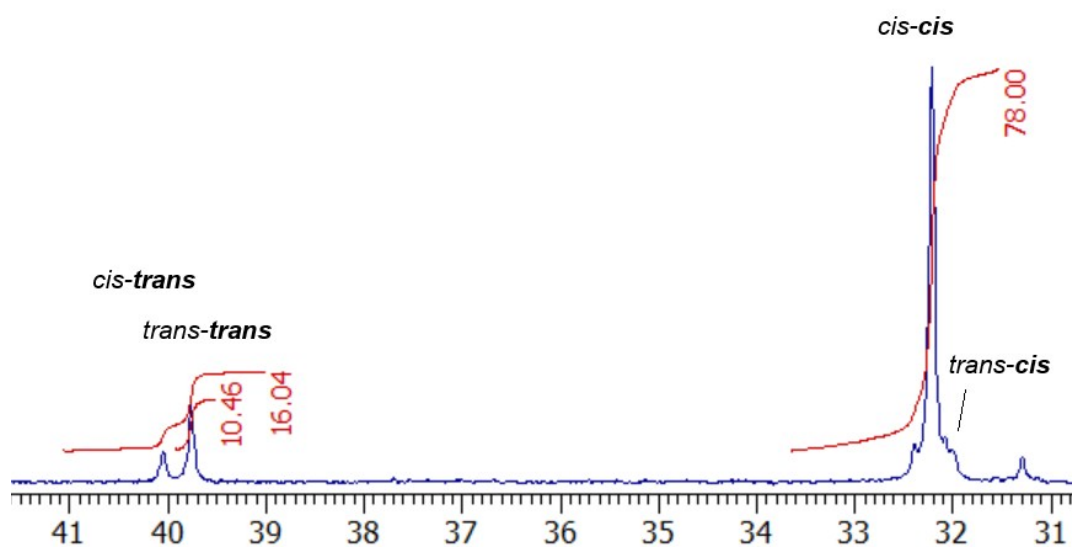

**Figure S17.**  $^{13}\text{C}$  NMR of polyisoprene obtained in Table 2, run 7 (125 MHz, in  $\text{CDCl}_3$ ).

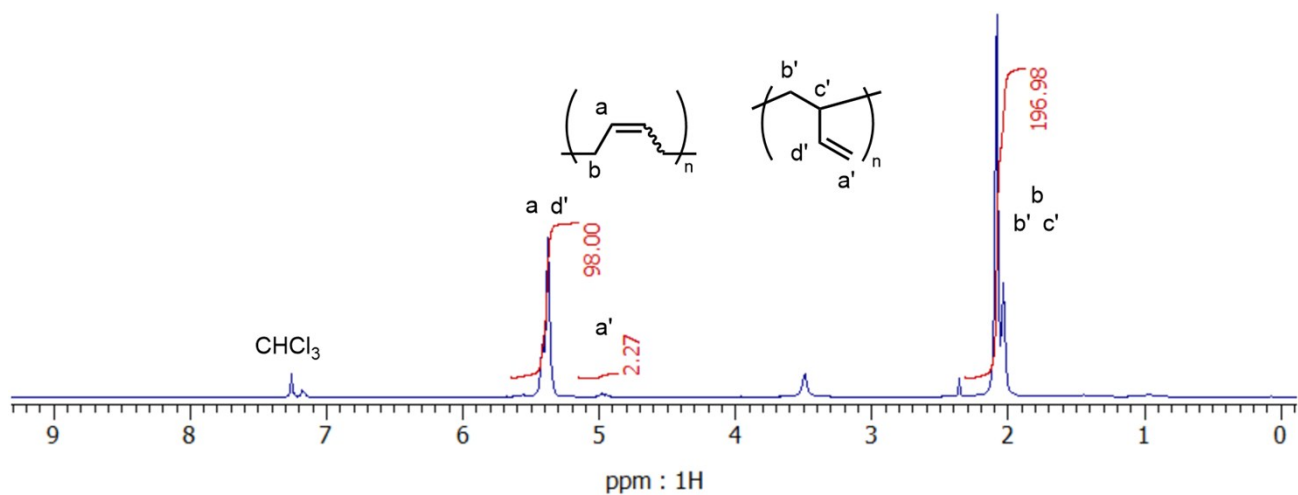

**Figure S18.**  $^1\text{H}$  NMR of polybutadiene obtained in Table 2, run 10 (500 MHz, in  $\text{CDCl}_3$ ).

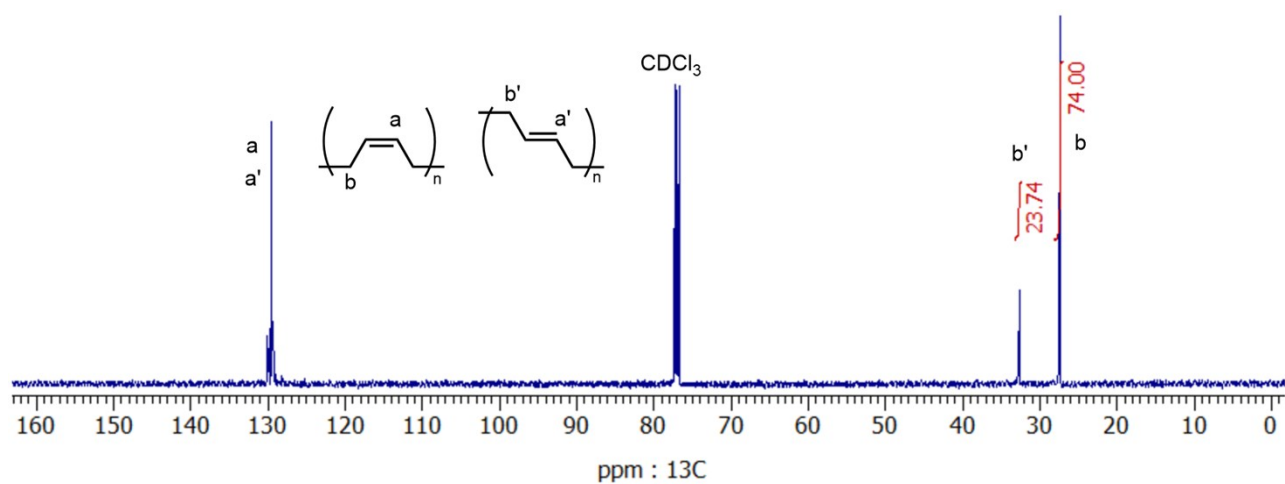

**Figure S19.**  $^{13}\text{C}$  NMR of polybutadiene obtained in Table 2, run 10 (125 MHz, in  $\text{CDCl}_3$ ).

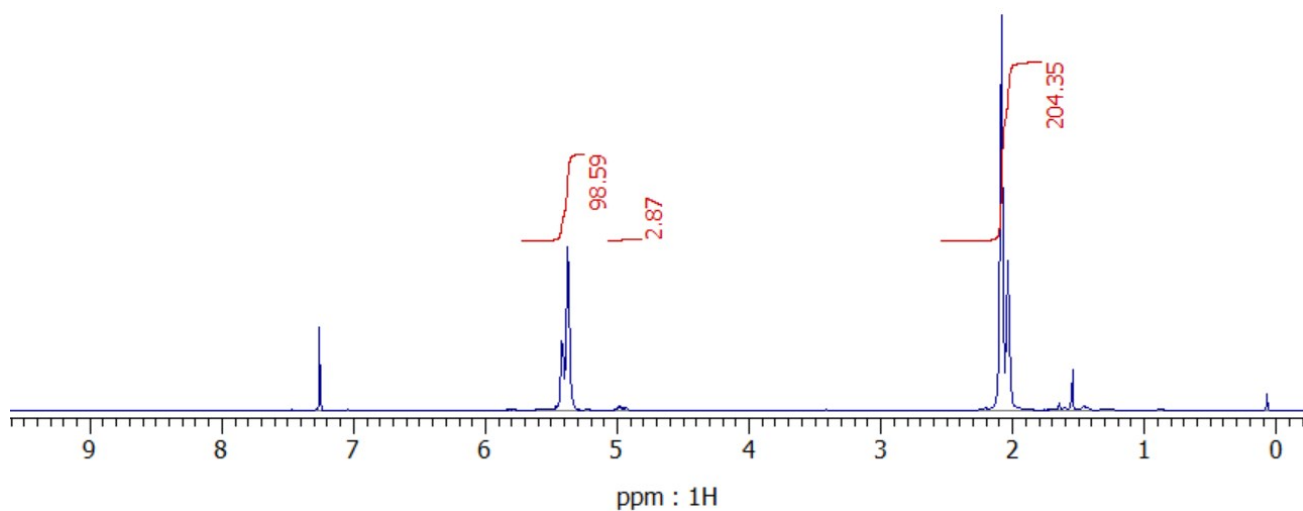

**Figure S20.** <sup>1</sup>H NMR of polyisoprene obtained in Table 2, run 11 (500 MHz, in CDCl<sub>3</sub>).

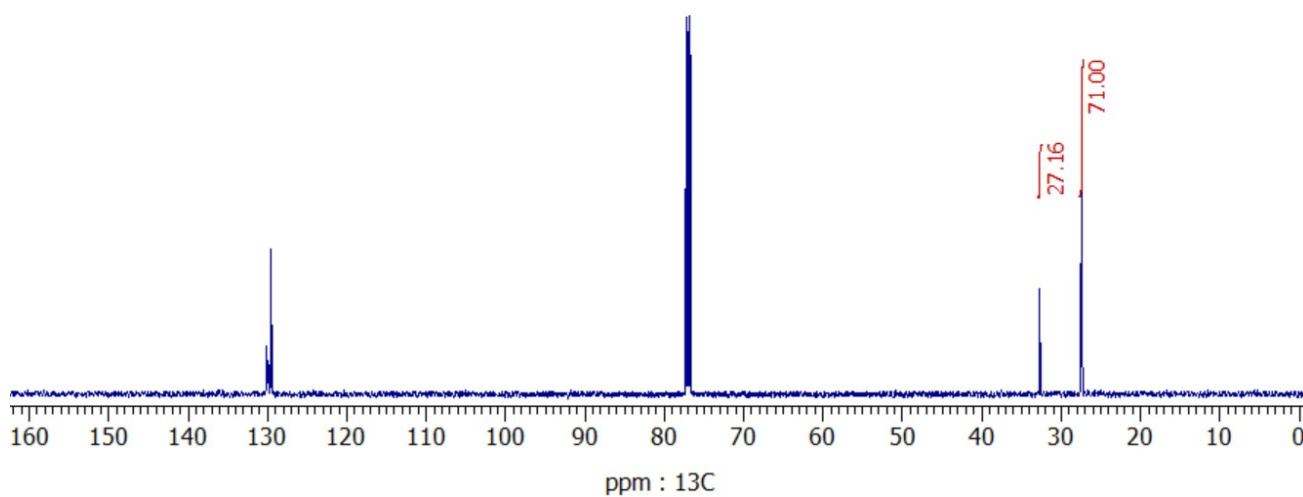

**Figure S21.** <sup>13</sup>C NMR of polyisoprene obtained in Table 2, run 11 (125 MHz, in CDCl<sub>3</sub>).

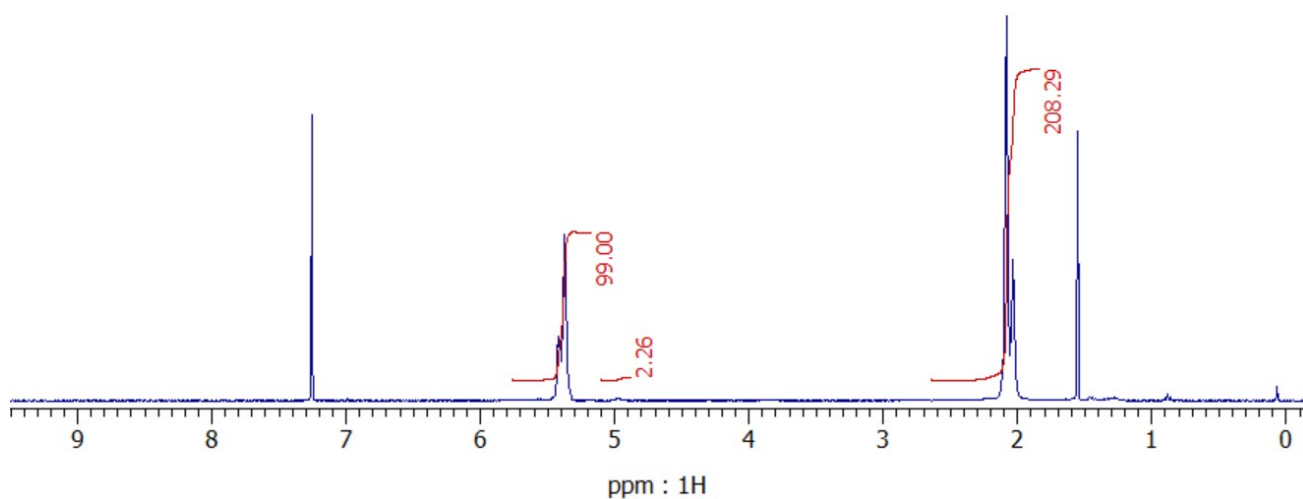

**Figure S22.** <sup>1</sup>H NMR of polybutadiene obtained in Table 2, run 12 (500 MHz, in CDCl<sub>3</sub>).

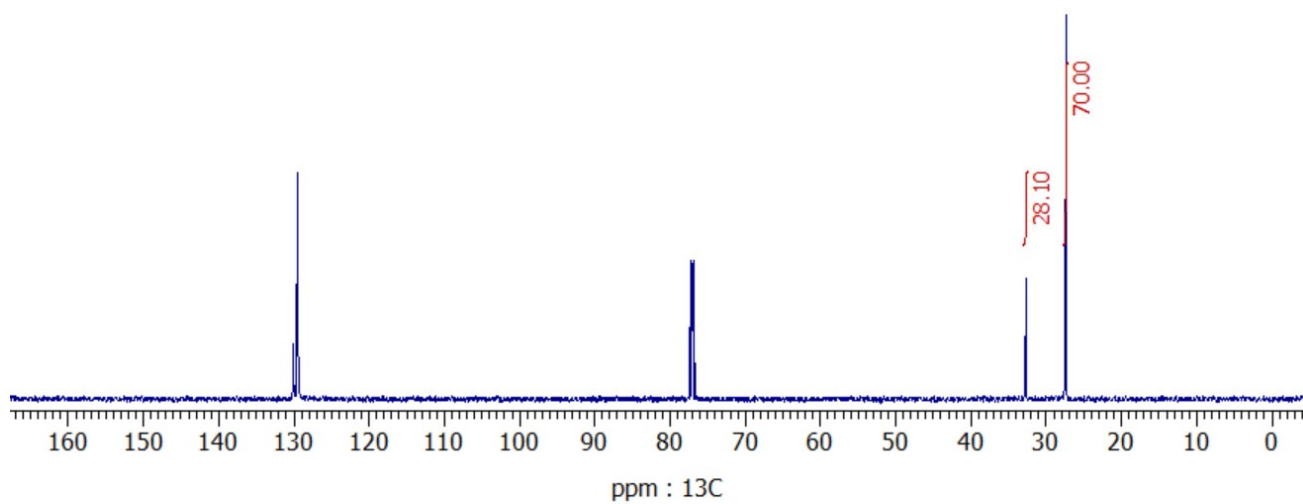

**Figure S23.** <sup>13</sup>C NMR of polybutadiene obtained in Table 2, run 12 (125 MHz, in CDCl<sub>3</sub>).

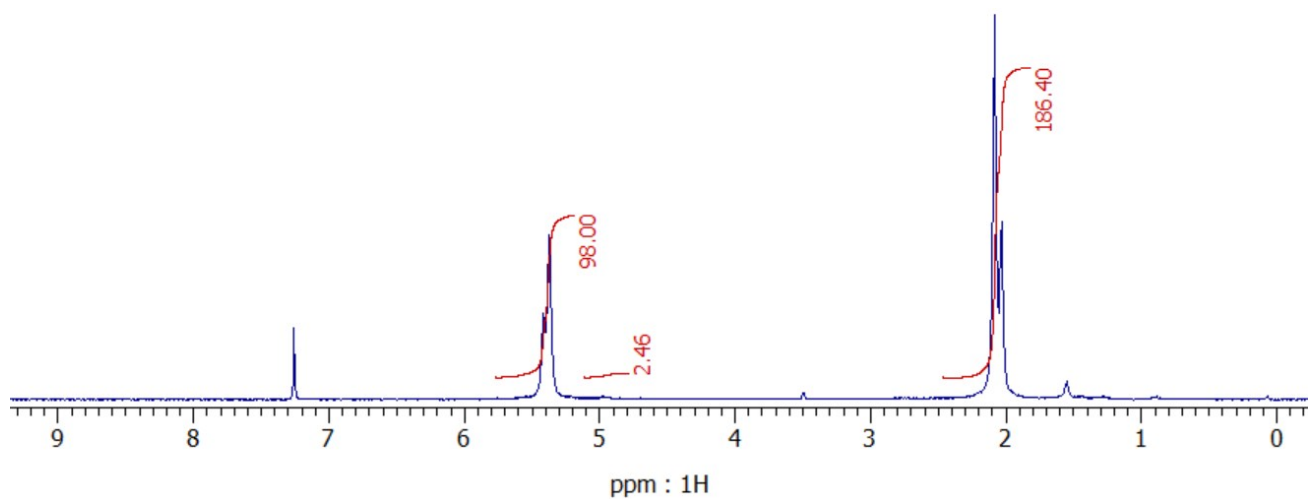

**Figure S24.**  $^1\text{H}$  NMR of polybutadiene obtained in Table 2, run 13 (500 MHz, in  $\text{CDCl}_3$ ).

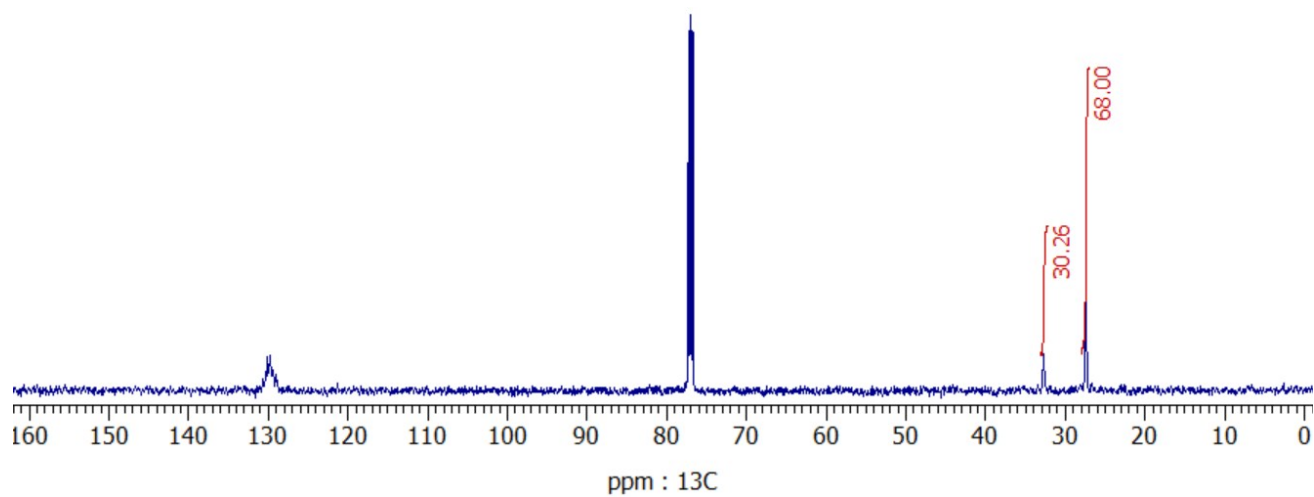

**Figure S25.**  $^{13}\text{C}$  NMR of polybutadiene obtained in Table 2, run 13 (125 MHz, in  $\text{CDCl}_3$ ).

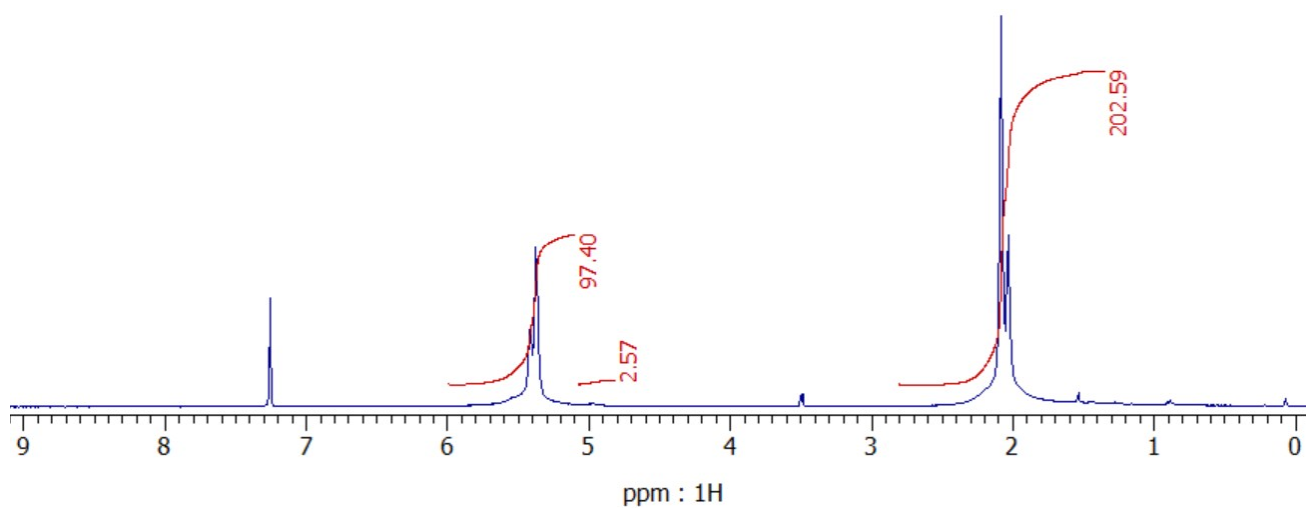

**Figure S26.**  $^1\text{H}$  NMR of polybutadiene obtained in Table 2, run 14 (500 MHz, in  $\text{CDCl}_3$ ).

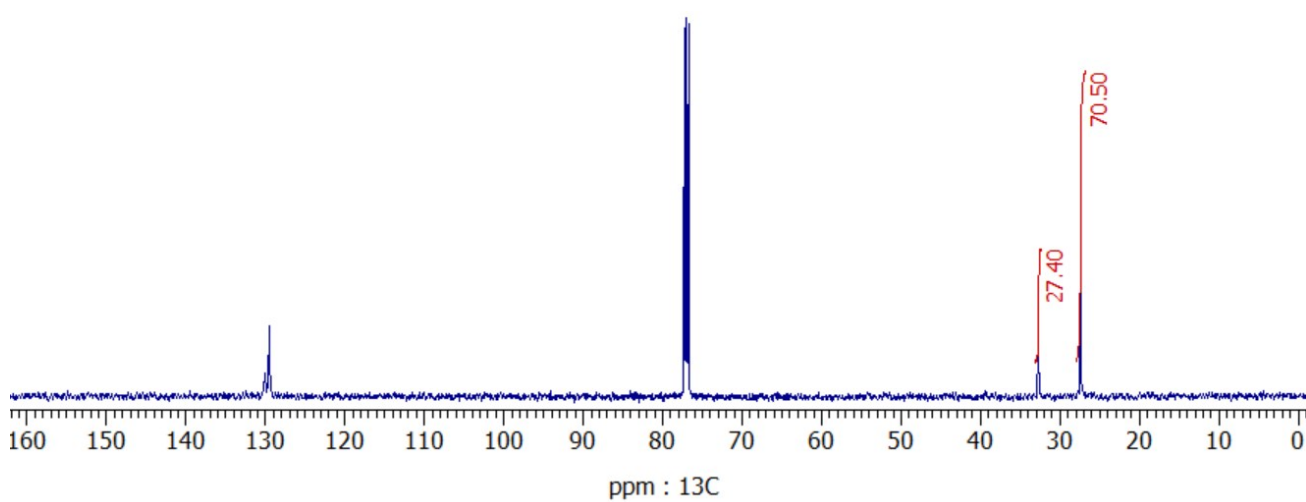

**Figure S27.**  $^{13}\text{C}$  NMR of polybutadiene obtained in Table 2, run 14 (125 MHz, in  $\text{CDCl}_3$ ).



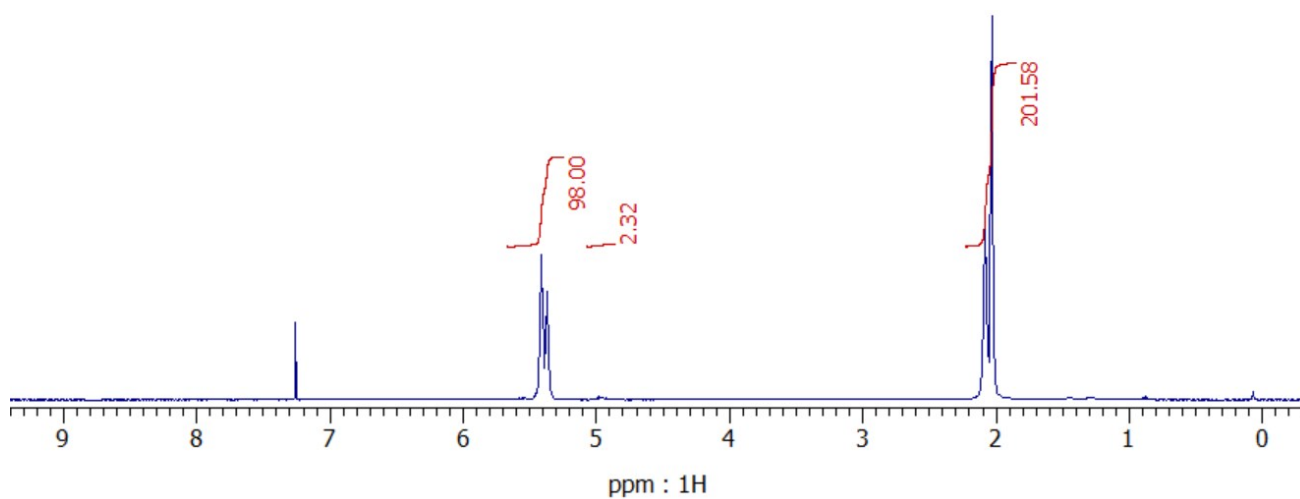

**Figure S28.**  $^1\text{H}$  NMR of polybutadiene obtained in Table 2, run 15 (500 MHz, in  $\text{CDCl}_3$ ).

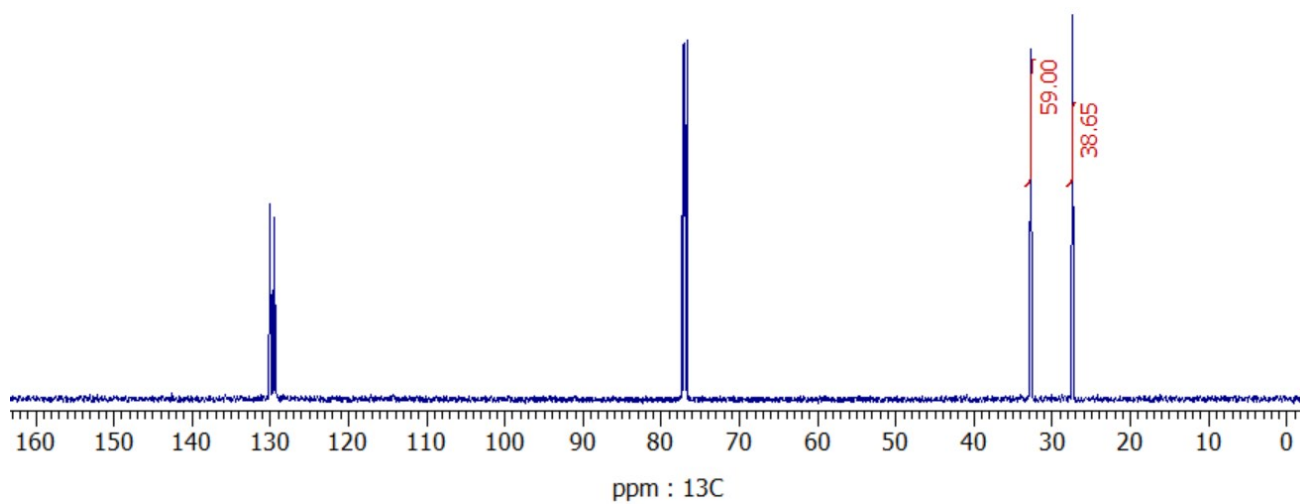

**Figure S29.**  $^{13}\text{C}$  NMR of polybutadiene obtained in Table 2, run 15 (125 MHz, in  $\text{CDCl}_3$ ).

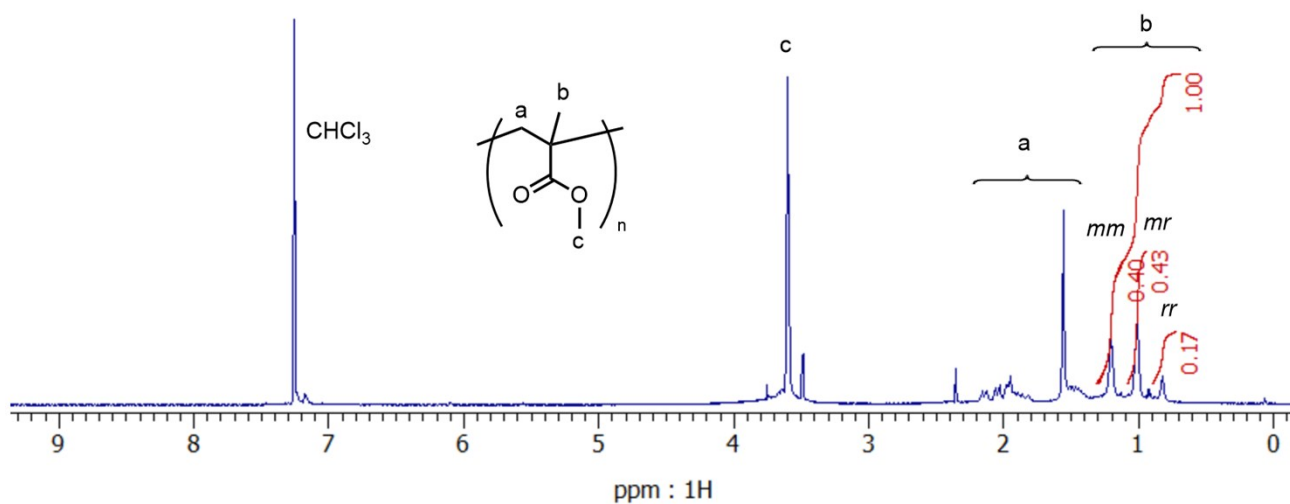

**Figure S30.** <sup>1</sup>H NMR of PMMA obtained in Table 3, run 1 (500 MHz, in CDCl<sub>3</sub>).

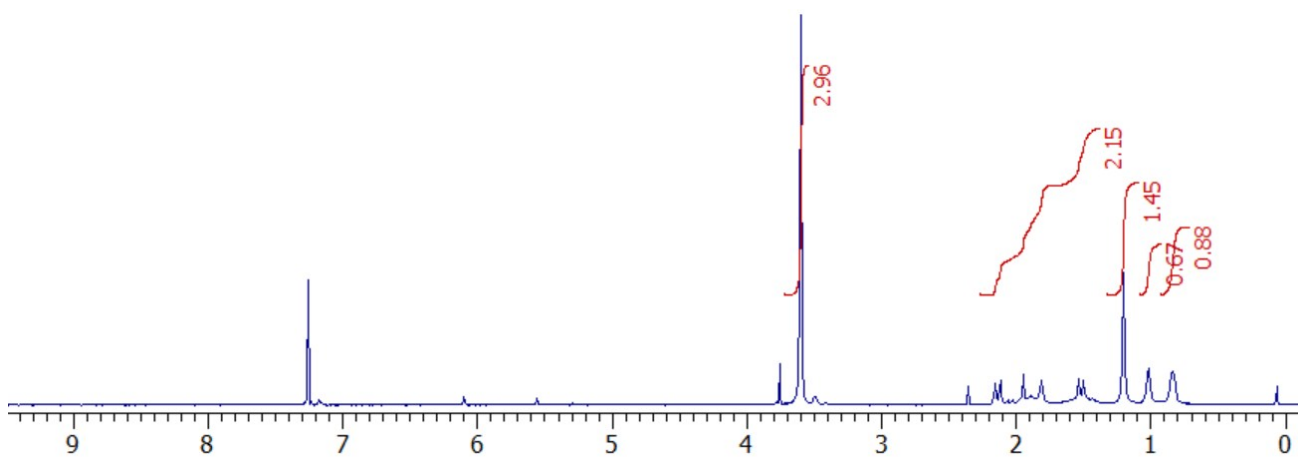

**Figure S31.** <sup>1</sup>H NMR of PMMA obtained in Table 3, run 2 (500 MHz, in CDCl<sub>3</sub>).

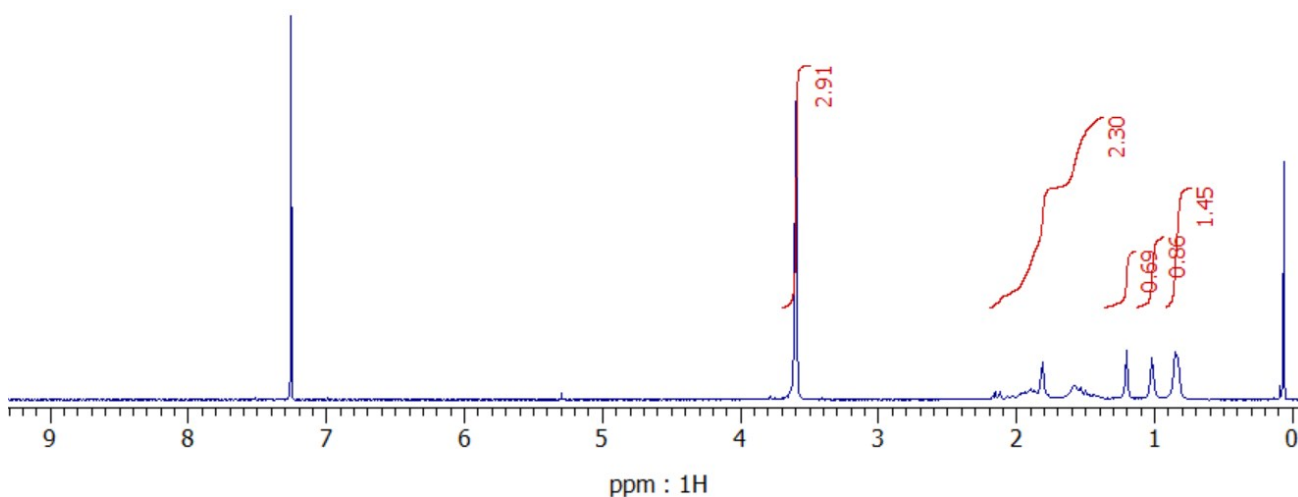

**Figure S32.** <sup>1</sup>H NMR of PMMA obtained in Table 3, run 3 (500 MHz, in CDCl<sub>3</sub>).

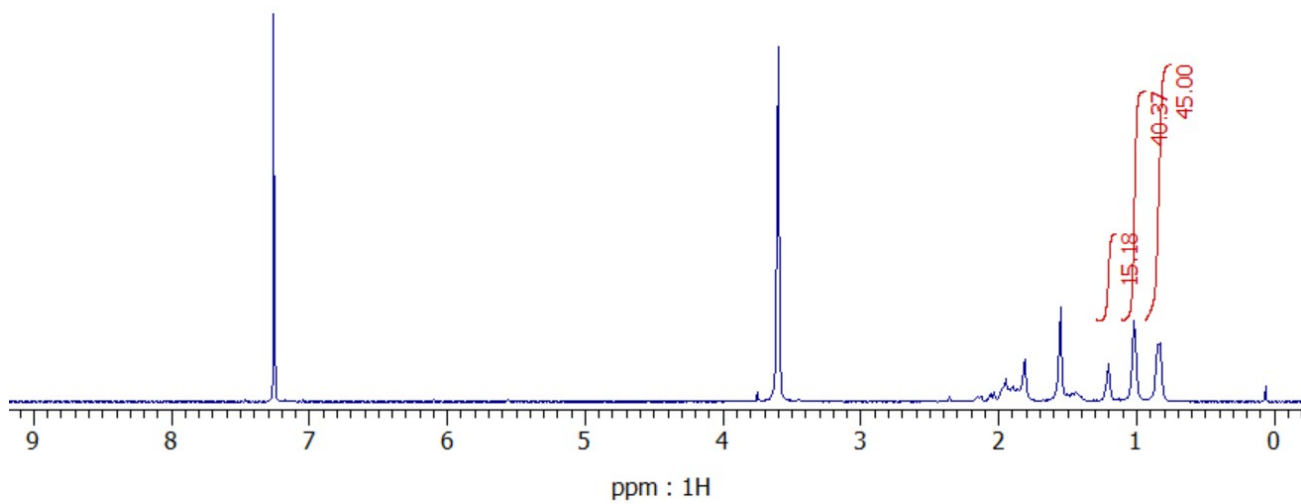

**Figure S33.** <sup>1</sup>H NMR of PMMA obtained in Table 3, run 6 (500 MHz, in CDCl<sub>3</sub>).
